# Supplementary material for: Gut microbiome mediates host genomic effects on phenotypes: a case study with fat deposition in pigs
Source: PubMed Central journal article supplement (PMC7809165; doi:10.1016/j.csbj.2020.12.038), 2020-12-30
Supplement: mmc1.pdf [file mmc1.pdf]

1 **Table S1:** Summary of results for the M1, M1L, M4 and M4L models.  
 2

| Trait <sup>1</sup> | Total <sup>2</sup> |      | OTU <sup>3</sup> | Indirect <sup>4</sup> |       |      |       |          |             |
|--------------------|--------------------|------|------------------|-----------------------|-------|------|-------|----------|-------------|
|                    | <i>P</i> -val      | Boot |                  | Mediation             | Sobel | Boot | Perm  | Emp Test | Sobel & Emp |
| FATg               | 8,195              | 495  | S2a              | 1069                  | 96    | 181  | 0     | 0        | 0           |
|                    |                    |      | S2b              | 2311                  | 339   | 464  | 812   | 464      | 209         |
| BF1                | 6,168              | 237  | S2a              | 1326                  | 132   | 225  | 423   | 225      | 77          |
|                    |                    |      | S2b              | 2571                  | 350   | 492  | 918   | 492      | 204         |
| BF2                | 7,115              | 314  | S2a              | 1255                  | 140   | 230  | 434   | 230      | 95          |
|                    |                    |      | S2b              | 2337                  | 321   | 461  | 793   | 461      | 196         |
| BF3                | 7,890              | 273  | S2a              | 1230                  | 122   | 189  | 399   | 189      | 66          |
|                    |                    |      | S2b              | 1874                  | 273   | 333  | 640   | 333      | 173         |
| FATt               | 7,718              | 358  | S2a              | 1240                  | 142   | 238  | 451   | 238      | 86          |
|                    |                    |      | S2b              | 1611                  | 174   | 279  | 552   | 279      | 108         |
|                    |                    |      | S3a              | 2971                  | 525   | 722  | 0     | 0        | 0           |
|                    |                    |      | S3b              | 1420                  | 138   | 258  | 2     | 1        | 0           |
|                    |                    |      | S3c              | 1707                  | 237   | 344  | 616   | 344      | 149         |
| BF4                | 8,440              | 482  | S2a              | 1139                  | 144   | 212  | 374   | 212      | 83          |
|                    |                    |      | S2b              | 1411                  | 153   | 264  | 525   | 264      | 105         |
|                    |                    |      | S3a              | 2896                  | 491   | 659  | 1,096 | 659      | 308         |
|                    |                    |      | S3b              | 1470                  | 150   | 243  | 484   | 243      | 90          |
|                    |                    |      | S3c              | 1868                  | 236   | 380  | 662   | 380      | 141         |
| BFt                | 6,811              | 497  | S2a              | 1136                  | 110   | 202  | 422   | 202      | 76          |
|                    |                    |      | S2b              | 1580                  | 187   | 299  | 569   | 299      | 119         |
|                    |                    |      | S3a              | 2383                  | 360   | 526  | 907   | 526      | 230         |
|                    |                    |      | S3b              | 1217                  | 96    | 207  | 382   | 207      | 63          |
|                    |                    |      | S3c              | 1607                  | 212   | 292  | 533   | 292      | 136         |
| BEL                | 5,906              | 265  | S2a              | 1454                  | 181   | 292  | 512   | 292      | 125         |
|                    |                    |      | S2b              | 1679                  | 215   | 308  | 589   | 308      | 119         |
|                    |                    |      | S3a              | 3114                  | 531   | 747  | 1,235 | 747      | 308         |
|                    |                    |      | S3b              | 1338                  | 129   | 220  | 460   | 220      | 82          |
|                    |                    |      | S3c              | 1180                  | 95    | 176  | 408   | 176      | 58          |

3 <sup>1</sup>Measured (host phenotypic) or latent variables used in the analysis.

4 <sup>2</sup>Number of host genomic features identified as significant for the total effect ( $G \rightarrow P$ , models  
5 M1 or M1L). *P-val* reports the number of features showing *P*-value smaller than 0.05 for the  
6 Gamma effect. *Boot* reports the number of features resulting significant after bootstrapping.

7 <sup>3</sup>Gut microbial feature used as mediator for the estimation of the indirect effect ( $G \rightarrow M \rightarrow P$ ,  
8 models M4 or M4L).

9 <sup>4</sup>Number of host genomic features identified as significant for the indirect effect ( $G \rightarrow M \rightarrow P$ ,  
10 models M4 or M4L). *Mediation* reports the number of features showing a mediated effect larger  
11 than the direct effect. Moving to the right, the columns report the number of features in  
12 *Mediation* that were also significant for: Sobel test, Bootstrapping test, Permutation test,  
13 Bootstrapping and Permutation tests, all tests.

14

15

16 **Table S2:** Comparison of host genomic features found significantly affecting latent vs measured  
 17 variables for the total effect (G → P, models M1 or M1L). The table reports the number of host  
 18 genomic features identified as affecting latent variables which were also found affecting  
 19 measured variables.

20

| Latent variable <sup>1</sup> | Measured variable <sup>2</sup> | Total <sup>3</sup> |
|------------------------------|--------------------------------|--------------------|
| FATg                         | BF1                            | 126                |
|                              | BF2                            | 249                |
|                              | BF3                            | 119                |
|                              | None <sup>6</sup>              | 203                |
| FATt                         | BF4                            | 202                |
|                              | BFt                            | 216                |
|                              | BEL                            | 44                 |
|                              | None <sup>6</sup>              | 77                 |

21 <sup>1</sup>Latent variables (host phenotypic) used in the analysis. FATg: subcutaneous backfat deposition  
 22 from 118 to 174 days of life. FATf: backfat and belly deposition at slaughter (197 days).

23 <sup>2</sup>Measured variable (host phenotypic) used in the analysis. BF1, BF2, BF3 and BF4: measures of  
 24 subcutaneous fat depth taken *in vivo* at the age of 118.1±1.16 d; 145.9±1.53 d, 174.3±1.43 d and  
 25 196.6±8.03 d, respectively. BFt: measure of subcutaneous fat depth taken *post mortem*. BEL:  
 26 weight of belly cut taken *post mortem*.

27 <sup>3</sup>Number of host genomic features identified for the total effect (G → P, models M1 or M1L).

28

29

30 **Table S3:** Comparison of host genomic features found significantly affecting latent vs measured  
 31 variables for the indirect effect ( $G \rightarrow M \rightarrow P$ , models M4 or M4L). The table reports the number  
 32 of host genomic features identified as affecting latent variables which were also found affecting  
 33 measured variables.

34

| Latent variable <sup>1</sup> | OTU <sup>2</sup>  | Measured variable <sup>3</sup> | Indirect <sup>4</sup> |
|------------------------------|-------------------|--------------------------------|-----------------------|
| FATg                         | S2a               | BF1                            | 0                     |
|                              |                   | BF2                            | 0                     |
|                              |                   | BF3                            | 0                     |
|                              |                   | None <sup>5</sup>              | 0                     |
|                              | S2b               | BF1                            | 182                   |
|                              |                   | BF2                            | 276                   |
|                              |                   | BF3                            | 147                   |
|                              |                   | None <sup>5</sup>              | 97                    |
| FATt                         | S2a               | BF4                            | 36                    |
|                              |                   | BFt                            | 82                    |
|                              |                   | BEL                            | 42                    |
|                              |                   | None <sup>5</sup>              | 119                   |
|                              | S2b               | BF4                            | 56                    |
|                              |                   | BFt                            | 129                   |
|                              |                   | BEL                            | 52                    |
|                              |                   | None <sup>5</sup>              | 109                   |
| FATt                         | S3a               | BF4                            | 0                     |
|                              |                   | BFt                            | 0                     |
|                              |                   | BEL                            | 0                     |
|                              |                   | None <sup>5</sup>              | 0                     |
|                              | S3b               | BF4                            | 1                     |
|                              |                   | BFt                            | 0                     |
|                              |                   | BEL                            | 0                     |
|                              |                   | None <sup>5</sup>              | 0                     |
| S3c                          | BF4               | 113                            |                       |
|                              | BFt               | 116                            |                       |
|                              | BEL               | 52                             |                       |
|                              | None <sup>5</sup> | 125                            |                       |

35 <sup>1</sup>Latent variables (host phenotypic) used in the analysis. FATg: subcutaneous backfat deposition  
 36 from 118 to 174 days of life. FATf: backfat and belly deposition at slaughter (197 days).

37 <sup>2</sup>Gut microbial feature used as mediator for the estimation of the indirect effect ( $G \rightarrow M \rightarrow P$ ,  
 38 models M4 or M4L).

39 <sup>3</sup>Measured variable (host phenotypic) used in the analysis. BF1, BF2, BF3 and BF4: measures of  
 40 subcutaneous fat depth taken *in vivo* at the age of 118.1±1.16 d; 145.9±1.53 d, 174.3±1.43 d and  
 41 196.6±8.03 d, respectively. BFt: measure of subcutaneous fat depth taken *post mortem*. BEL:  
 42 weight of belly cut taken *post mortem*.

43 <sup>4</sup>Number of host genomic features identified for the indirect effect ( $G \rightarrow M \rightarrow P$ ).

44 <sup>5</sup>Indicates the number of host genomic features that were not identified using the measured  
45 variables.

46

47

48 **Table S4:** Top 15 host genomic regions with significant mediated or total effect on the latent  
 49 variables. Effects on FATg were mediated by S2b (*Peptococcus*) and effects on FATt were  
 50 mediated by S3c (*Butyricicoccus*).  
 51

| Trait | Effect   | Rank | Chromosome | Start position (bp) | End position (bp) | Effect (abs.) | Genes                                                                                                                                                                       |
|-------|----------|------|------------|---------------------|-------------------|---------------|-----------------------------------------------------------------------------------------------------------------------------------------------------------------------------|
|       |          | 1    | 17         | 37920822            | 37938790          | 0.0162        | DYNLRB1                                                                                                                                                                     |
|       |          | 2    | 7          | 134388813           | 134388813         | 0.0161        |                                                                                                                                                                             |
|       |          | 3    | 2          | 30870402            | 30999341          | 0.0160        |                                                                                                                                                                             |
|       |          | 4    | 10         | 66364425            | 66364425          | 0.0146        |                                                                                                                                                                             |
|       |          | 5    | 6          | 147237661           | 147237661         | 0.0146        | AK4                                                                                                                                                                         |
|       |          | 6    | 16         | 7358991             | 7358991           | 0.0146        |                                                                                                                                                                             |
|       |          | 7    | 16         | 9664975             | 9811863           | 0.0145        |                                                                                                                                                                             |
|       |          | 8    | 7          | 91966976            | 91966976          | 0.0144        | RAD51B                                                                                                                                                                      |
|       |          | 9    | 16         | 2931783             | 2931783           | 0.0143        |                                                                                                                                                                             |
|       |          | 10   | 7          | 95549575            | 95549575          | 0.0143        | RGS6                                                                                                                                                                        |
| FATg  | Mediated |      |            |                     |                   |               | REC8,<br>PSME2,<br>EMC9,<br>PCK2, NRL,<br>CPNE6,<br>CARMIL3,<br>JPH4,<br>AP1G2,<br>THTPA,<br>ZFHX2,<br>MIR208A,<br>IL25, EFS,<br>SLC22A17,<br>PPP1R3E,<br>HOMEZ,<br>RNF212B |
|       |          | 11   | 7          | 75121635            | 75830988          | 0.0142        |                                                                                                                                                                             |
|       |          | 12   | 5          | 110792250           | 110792250         | 0.0141        |                                                                                                                                                                             |
|       |          | 13   | 4          | 12603508            | 12603508          | 0.0137        |                                                                                                                                                                             |
|       |          | 14   | 8          | 134362111           | 134362111         | 0.0136        |                                                                                                                                                                             |
|       |          | 15   | 13         | 205628626           | 205687638         | 0.0136        | ABCG1,<br>TFF3, TFF2                                                                                                                                                        |
|       |          | 1    | 3          | 126974179           | 126974179         | 0.1013        | ASAP2                                                                                                                                                                       |
|       |          | 2    | 5          | 28604085            | 28604085          | 0.0997        | SRGAP1,<br>C12orf66                                                                                                                                                         |
| FATg  | Total    |      |            |                     |                   |               | FCHO1,<br>MAP1S,<br>COLGALT1,<br>PGLS,<br>SLC27A1,                                                                                                                          |
|       |          | 3    | 2          | 59957369            | 60318677          | 0.0988        |                                                                                                                                                                             |

|    |    |           |           |        |                                                                                                                                                                  |
|----|----|-----------|-----------|--------|------------------------------------------------------------------------------------------------------------------------------------------------------------------|
|    |    |           |           |        | NXNL1,<br>MVB12A,<br>CCDC194                                                                                                                                     |
| 4  | 1  | 219816097 | 221276670 | 0.0956 | SMARCA2,<br>DMRT2,<br>DMRT3,<br>KANK1,<br>DOCK8                                                                                                                  |
| 5  | 1  | 193610978 | 194258004 | 0.0950 | ESR2,<br>SYNE2                                                                                                                                                   |
| 6  | 9  | 8014440   | 8014440   | 0.0923 | FAM168A                                                                                                                                                          |
| 7  | 7  | 4076029   | 4095479   | 0.0922 |                                                                                                                                                                  |
| 8  | 1  | 74467285  | 75058189  | 0.0920 | AFG1L,<br>ARMC2,<br>SESN1                                                                                                                                        |
| 9  | 15 | 118809721 | 118809721 | 0.0900 |                                                                                                                                                                  |
| 10 | 1  | 183336668 | 185654681 | 0.0887 | BMP4,<br>CDKN3,<br>GMFB,<br>CGRRF1,<br>SAMD4A,<br>GCH1,<br>WDHD1,<br>SOCS4,<br>MAPK1IP1L,<br>LGALS3,<br>DLGAP5,<br>FBXO34,<br>ATG14,<br>TBPL2,<br>KTN1,<br>PELI2 |
| 11 | 13 | 95481059  | 99700583  | 0.0881 | PLCH1,<br>GMPS,<br>KCB1,<br>TIPARP,<br>CCNL1,<br>VEPH1,<br>SHOX2,<br>RSRC1,<br>GFM1, LXN,<br>RARRES1,<br>MFSD1,<br>IQCJ                                          |
| 12 | 6  | 63310472  | 63895672  | 0.0872 | SAMD11,<br>NOC2L,                                                                                                                                                |

|      |          |    |    |           |           |                                                                                                                                                                                                                                                                        |                                                                    |
|------|----------|----|----|-----------|-----------|------------------------------------------------------------------------------------------------------------------------------------------------------------------------------------------------------------------------------------------------------------------------|--------------------------------------------------------------------|
|      |          |    |    |           |           | KLHL17,<br>PLEKHN1,<br>HES4,<br>AGRN,<br>RNF223,<br>TNFRSF4,<br>SDF4,<br>B3GALT6,<br>C1QTNF12,<br>UBE2J2,<br>ACAP3,<br>PUSL1,<br>INTS11,<br>DVL1,<br>MXRA8,<br>AURKAIP1,<br>CCNL2,<br>MRPL20,<br>VWA1,<br>ATAD3A,<br>TMEM240,<br>MIB2,<br>MMP23B,<br>SLC35E2B,<br>GNB1 |                                                                    |
|      |          | 13 | 18 | 9598458   | 9979869   | 0.0870                                                                                                                                                                                                                                                                 | KDM7A,<br>PARP12,<br>TBXAS1,<br>HIPK2                              |
|      |          | 14 | 13 | 77535708  | 77558751  | 0.0869                                                                                                                                                                                                                                                                 | STAG1                                                              |
|      |          | 15 | 1  | 189896026 | 189896026 | 0.0867                                                                                                                                                                                                                                                                 | MT1                                                                |
|      |          | 1  | 9  | 26759246  | 26759246  | 0.0143                                                                                                                                                                                                                                                                 |                                                                    |
|      |          | 2  | 5  | 63702753  | 63702753  | 0.0134                                                                                                                                                                                                                                                                 |                                                                    |
|      |          | 3  | 7  | 65904152  | 65904152  | 0.0128                                                                                                                                                                                                                                                                 |                                                                    |
|      |          | 4  | 4  | 34938520  | 34938520  | 0.0124                                                                                                                                                                                                                                                                 | NCALD                                                              |
| FATt | Mediated | 5  | 12 | 47396819  | 47809068  | 0.0122                                                                                                                                                                                                                                                                 | RPH3AL,<br>DOC2B,<br>CRK,<br>MYO1C,<br>INPP5K,<br>PITP,<br>SLC43A2 |
|      |          | 6  | 16 | 958609    | 958609    | 0.0121                                                                                                                                                                                                                                                                 | CTNND2                                                             |
|      |          | 7  | 7  | 62371545  | 62438211  | 0.0118                                                                                                                                                                                                                                                                 | TTC6                                                               |
|      |          | 8  | 14 | 26641666  | 26641666  | 0.0117                                                                                                                                                                                                                                                                 |                                                                    |
|      |          | 9  | 7  | 90289029  | 90329629  | 0.0113                                                                                                                                                                                                                                                                 | CCDC196                                                            |



|      |       |    |    |           |           |        |                                                                                                                                     |
|------|-------|----|----|-----------|-----------|--------|-------------------------------------------------------------------------------------------------------------------------------------|
|      |       | 10 | 1  | 33781901  | 33781901  | 0.0112 |                                                                                                                                     |
|      |       | 11 | 2  | 5888217   | 5888217   | 0.0112 |                                                                                                                                     |
|      |       | 12 | 7  | 45236888  | 45394771  | 0.0112 |                                                                                                                                     |
|      |       | 13 | 2  | 7272254   | 7272254   | 0.0111 | ATG2A                                                                                                                               |
|      |       | 14 | 7  | 27550218  | 27550218  | 0.0110 | KHDRBS2                                                                                                                             |
|      |       | 15 | 3  | 129063098 | 129063098 | 0.0109 |                                                                                                                                     |
|      |       | 1  | 1  | 242984908 | 242984908 | 0.0918 | PLPPR1                                                                                                                              |
|      |       | 2  | 2  | 59957369  | 60261433  | 0.0910 | FCHO1,<br>MAP1S,<br>COLGALT1,<br>PGLS,<br>SLC27A1,<br>NXNL1                                                                         |
|      |       | 3  | 5  | 28604085  | 28604085  | 0.0910 | SRGAP1,<br>C12orf66                                                                                                                 |
|      |       | 4  | 11 | 20953383  | 20953383  | 0.0864 |                                                                                                                                     |
|      |       | 5  | 3  | 103288341 | 103288341 | 0.0853 | STRN                                                                                                                                |
|      |       | 6  | 5  | 68326348  | 68505852  | 0.0834 | ERC1                                                                                                                                |
|      |       | 7  | 1  | 193610978 | 194258004 | 0.0820 | ESR2,<br>SYNE2                                                                                                                      |
|      |       | 8  | 3  | 83365231  | 87200902  | 0.0810 | FANCL,<br>VRK2,<br>CCDC85A,<br>EFEMP1,<br>PNPT1,<br>CCDC88A,<br>MTIF2,<br>RPS27A,<br>CLHC1,<br>RTN4,<br>EML6,<br>SPTBN1,<br>C2orf73 |
|      |       | 9  | 14 | 1000181   | 1000181   | 0.0804 | SEMA4D                                                                                                                              |
|      |       | 10 | 3  | 135861845 | 135861845 | 0.0803 |                                                                                                                                     |
|      |       | 11 | 1  | 240661253 | 241120799 | 0.0802 | COL15A1,<br>TGFBRI,<br>ALG2                                                                                                         |
|      |       | 12 | 18 | 9598458   | 9979869   | 0.0799 | KDM7A,<br>PARP12,<br>TBXAS1,<br>HIPK2                                                                                               |
|      |       | 13 | 2  | 132702219 | 132702219 | 0.0797 | CHSY3                                                                                                                               |
|      |       | 14 | 1  | 284208765 | 284208765 | 0.0795 |                                                                                                                                     |
|      |       | 15 | 11 | 68288395  | 68312256  | 0.0791 | UBAC2                                                                                                                               |
| FATt | Total |    |    |           |           |        |                                                                                                                                     |
